# Supplementary material
Source: PubMed Central journal article supplement (PMC4049897)
Supplement: org-10-69-s01.pdf [file org-10-69-s01.pdf]

## **Supplemental Material to:**

**Gabrielle Whewey, David A Parry, and Colin A Johnson**

**The role of primary cilia in the development and disease  
of the retina**

**Organogenesis 2014; 10(1)**

**<http://dx.doi.org/10.4161/org.26710>**

**<http://www.landesbioscience.com/journals/organogenesis/article/26710>**

**<http://www.landesbioscience.com/journals/organogenesis/article/26710/2013ORG0052R1.XML>**
